# Supplementary material
Source: PubMed Central journal article supplement (PMC7466939)
Supplement: NIHMS1623763-supplement-Supplementary_Figure_2.pdf [file NIHMS1623763-supplement-Supplementary_Figure_2.pdf]

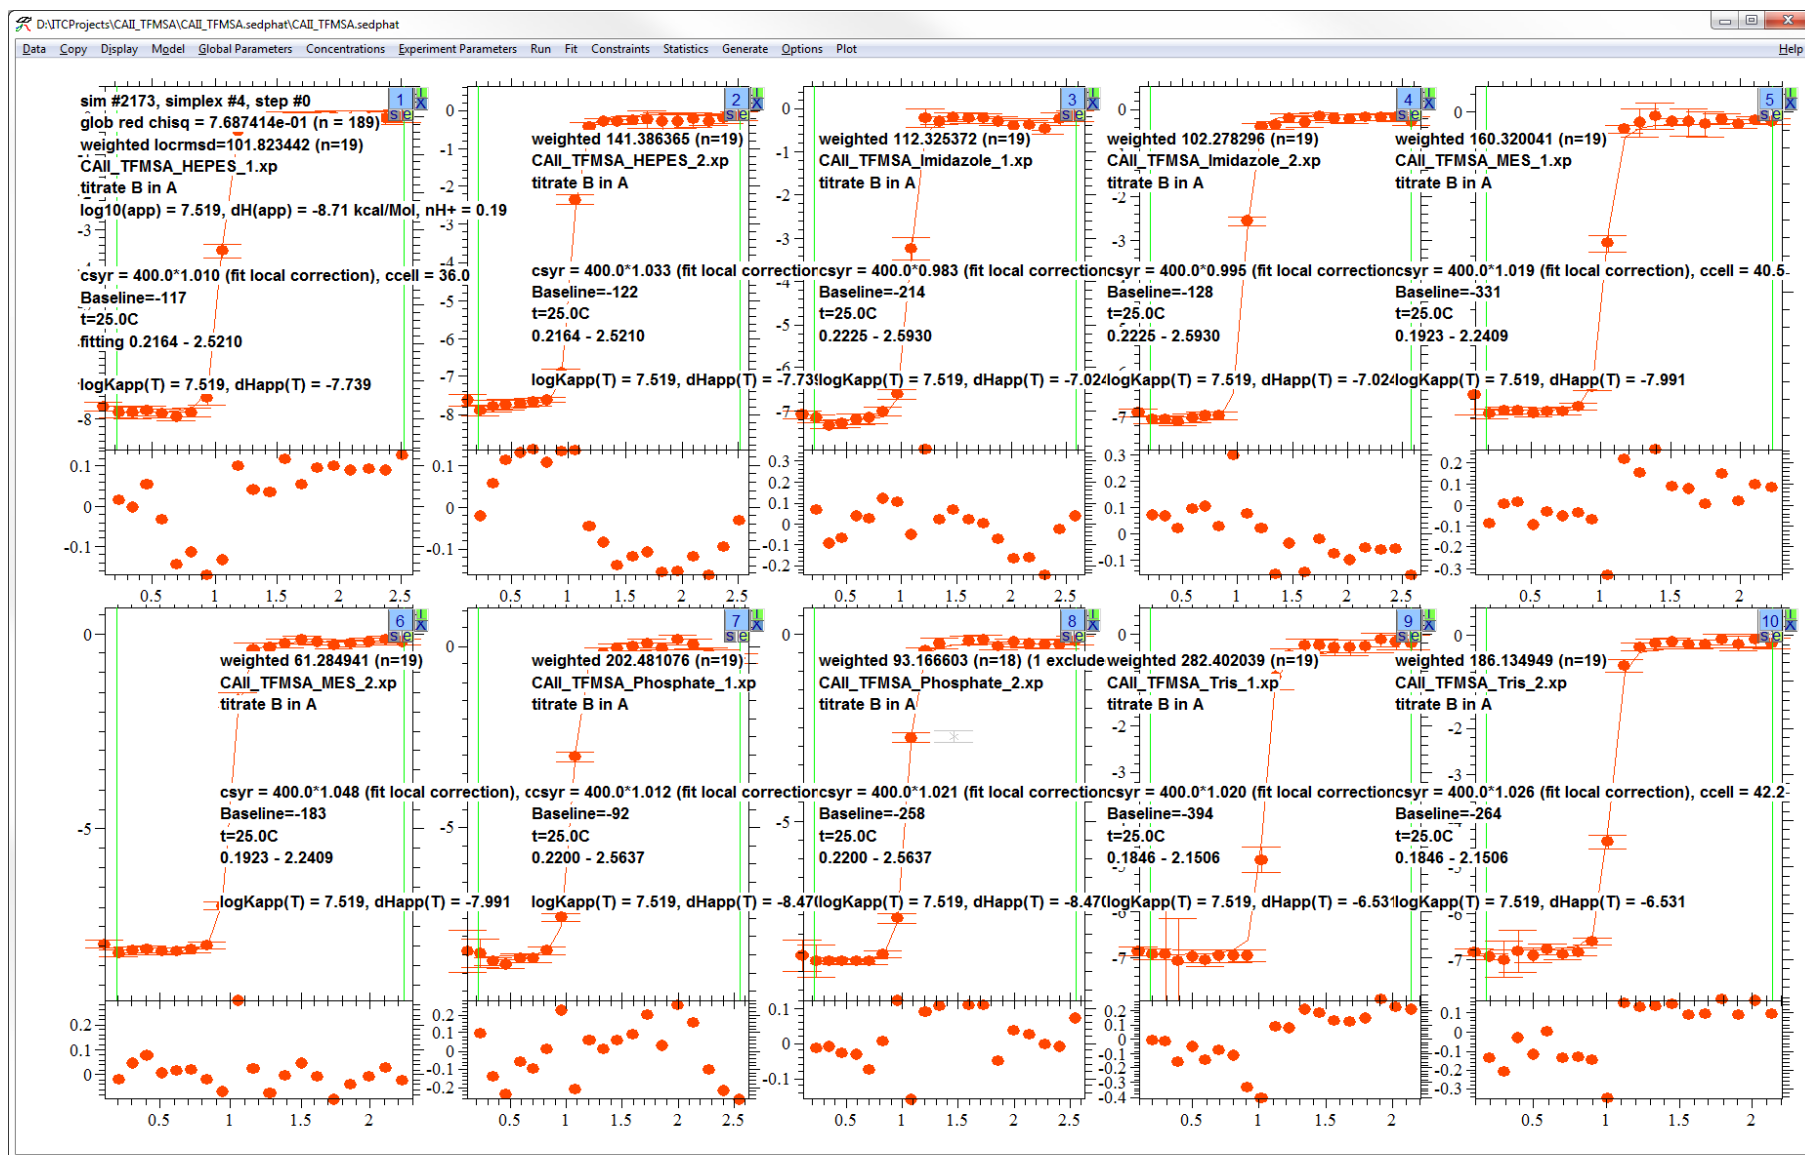

**Supplementary Figure 1:** Screenshot of the SEDPHAT window after fit has converged. In each experiment panel, the best-fit titration model is drawn as a solid line. For better inspection, the display can be freed of the textual output reporting global and local fit parameters by pressing ESC (it can be reproduced at any time by pressing control-O). It should be noted that the residuals are now on a reasonable scale, and for most experiments lack significant systematicity. The best-fit parameters can be obtained also in the model parameter box (control-P), or be summarized in a displayed ASCII text-file (control-T).
